# Supplementary material for: Validity of FuncUseRatio for Ecological Monitoring of Functional Arm Use After Stroke: Toward Precision Neurorehabilitation
Source: Research Square preprint supplement (doi:10.21203/rs.3.rs-8723804/v1), 2026-02-05
Supplement: Supplementary file 1 [file 59c0520ba88b7170ae1bb329.docx]

**Supplementary Table I: List of Functional Movements Performed by the Participants**

| **Activities** | **Position** | **Functional Movement** |
| --- | --- | --- |
| Food | Sit | Pour a drink |
| Food | Sit | Drink a glass |
| Food | Sit | Open a jar |
| Food | Sit | Eat |
| Office | Sit | Type on a keyboard |
| Office | Sit | Use a pair of scissors |
| Office | Sit | Write with a pen |
| Office | Sit | Browse a magazine |
| Dressing | Sit/Stand | Putting on/removing shoes |
| Dressing | Sit/Stand | Putting on/removing shorts |
| Preparing | Stand | Wiping a surface |
| Preparing | Stand | Wash your hands |
| Preparing | Stand | Take a high object and place it on a table |
| Preparing | Stand | Open a drawer and take an object |
| Preparing | Stand | Using a hammer |
| Preparing | Stand | Turning a light on/off |
| Preparing | Stand | Operating a door handle |
| Preparing | Stand | Pick up the phone |
| Beauty care | Stand | Wear deodorant |
| Beauty care | Stand | Brushing your teeth |
| Beauty care | Stand | Style hair |
| Beauty care | Stand | Putting on/removing glasses |
| Non  manual activity | Sit/Stand | Stand up, walk, step over obstacles, turn around, slalom and sit down |


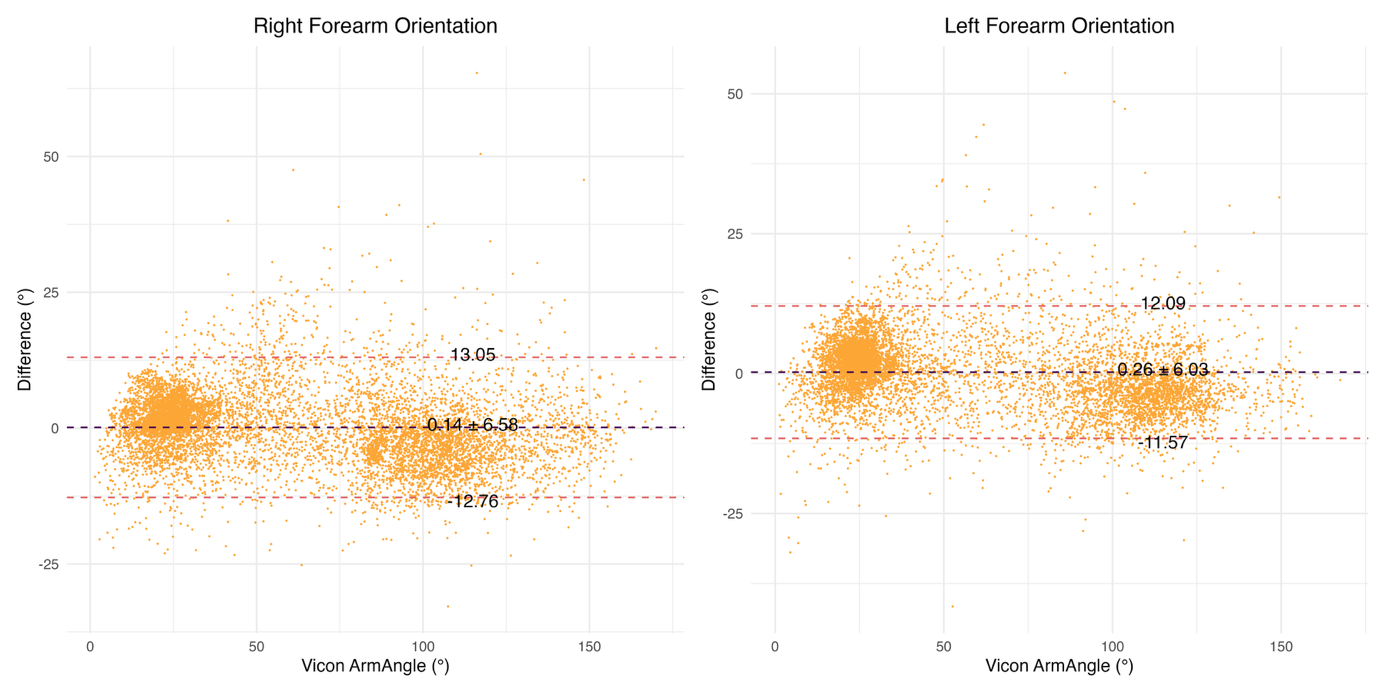


Supplementary Figure 1.Bland–Altman statistics (mean bias and limits of agreement) were computed on a randomly selected subset consisting of 1 out of every 100 samples, in order to improve readability.


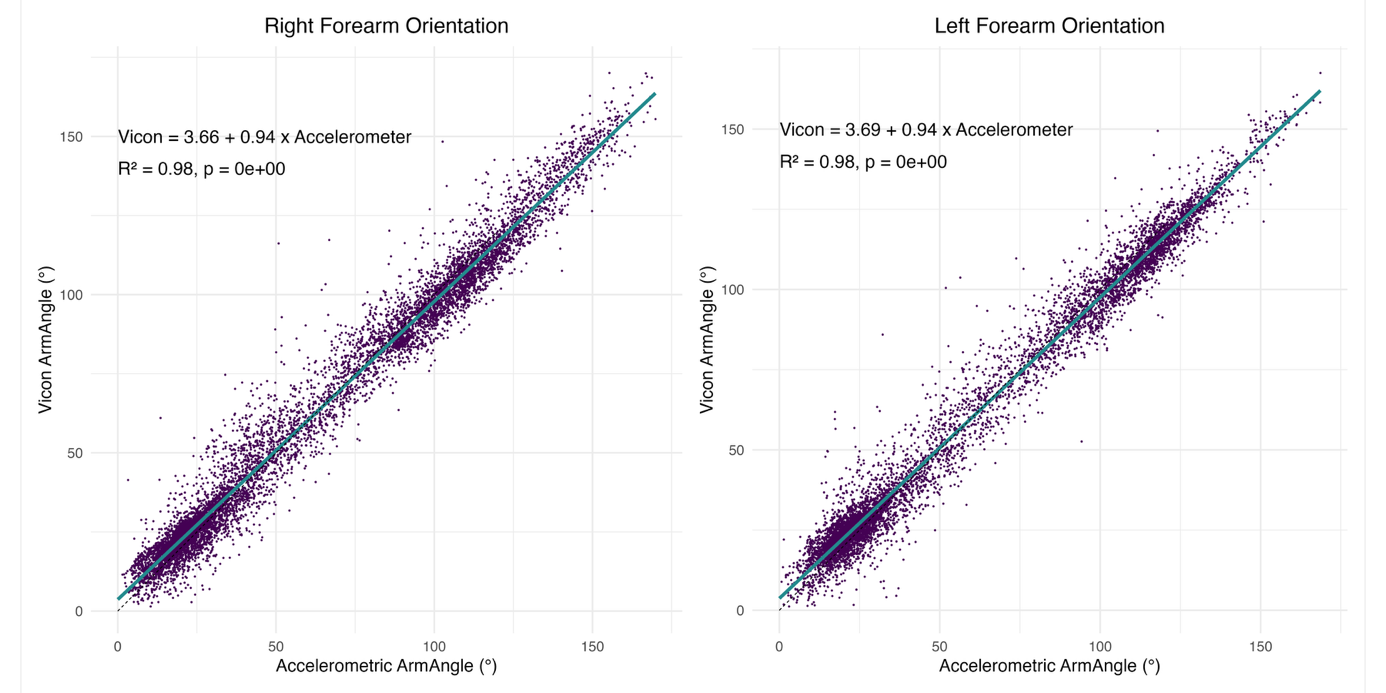


Supplementary material Figure 2.Linear regression models were fitted using a randomly selected subset of the forearm orientation data (1 sample out of 100). This subsampling was applied both for model estimation and for visualization purposes.


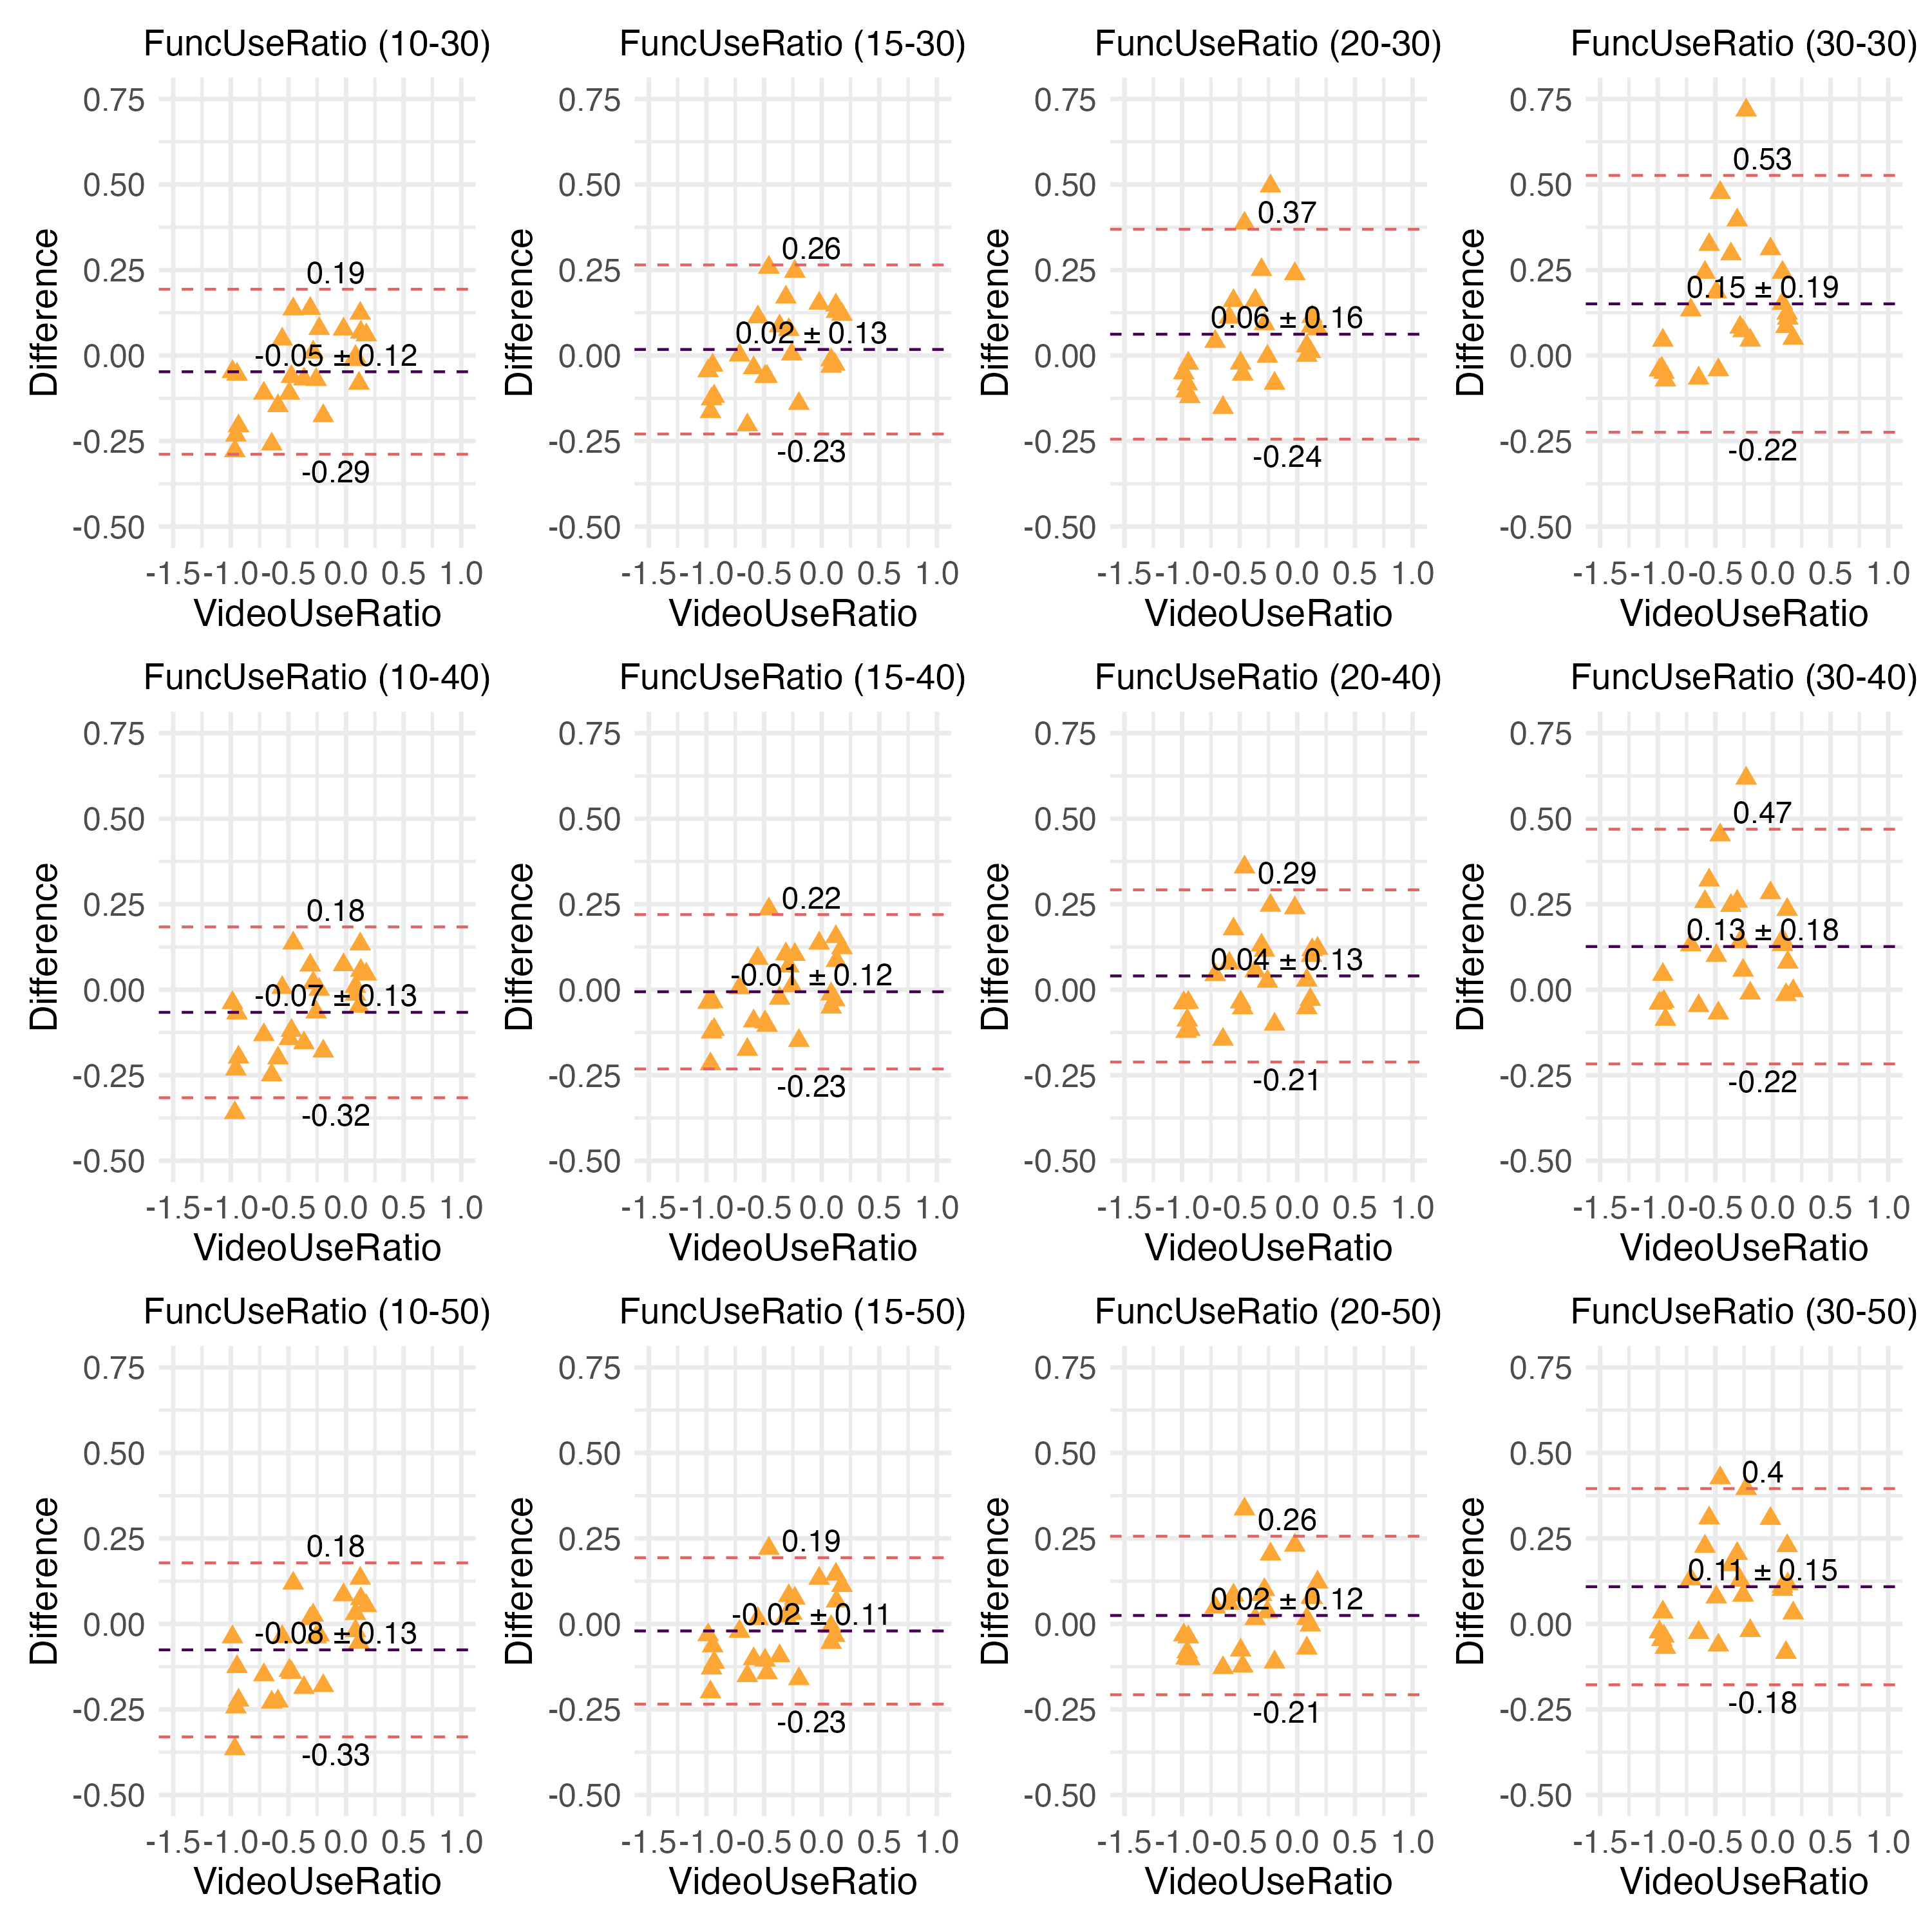


Supplementary material Figure 3.Bland–Altman plots of FuncUseRation for all parameter combinations.


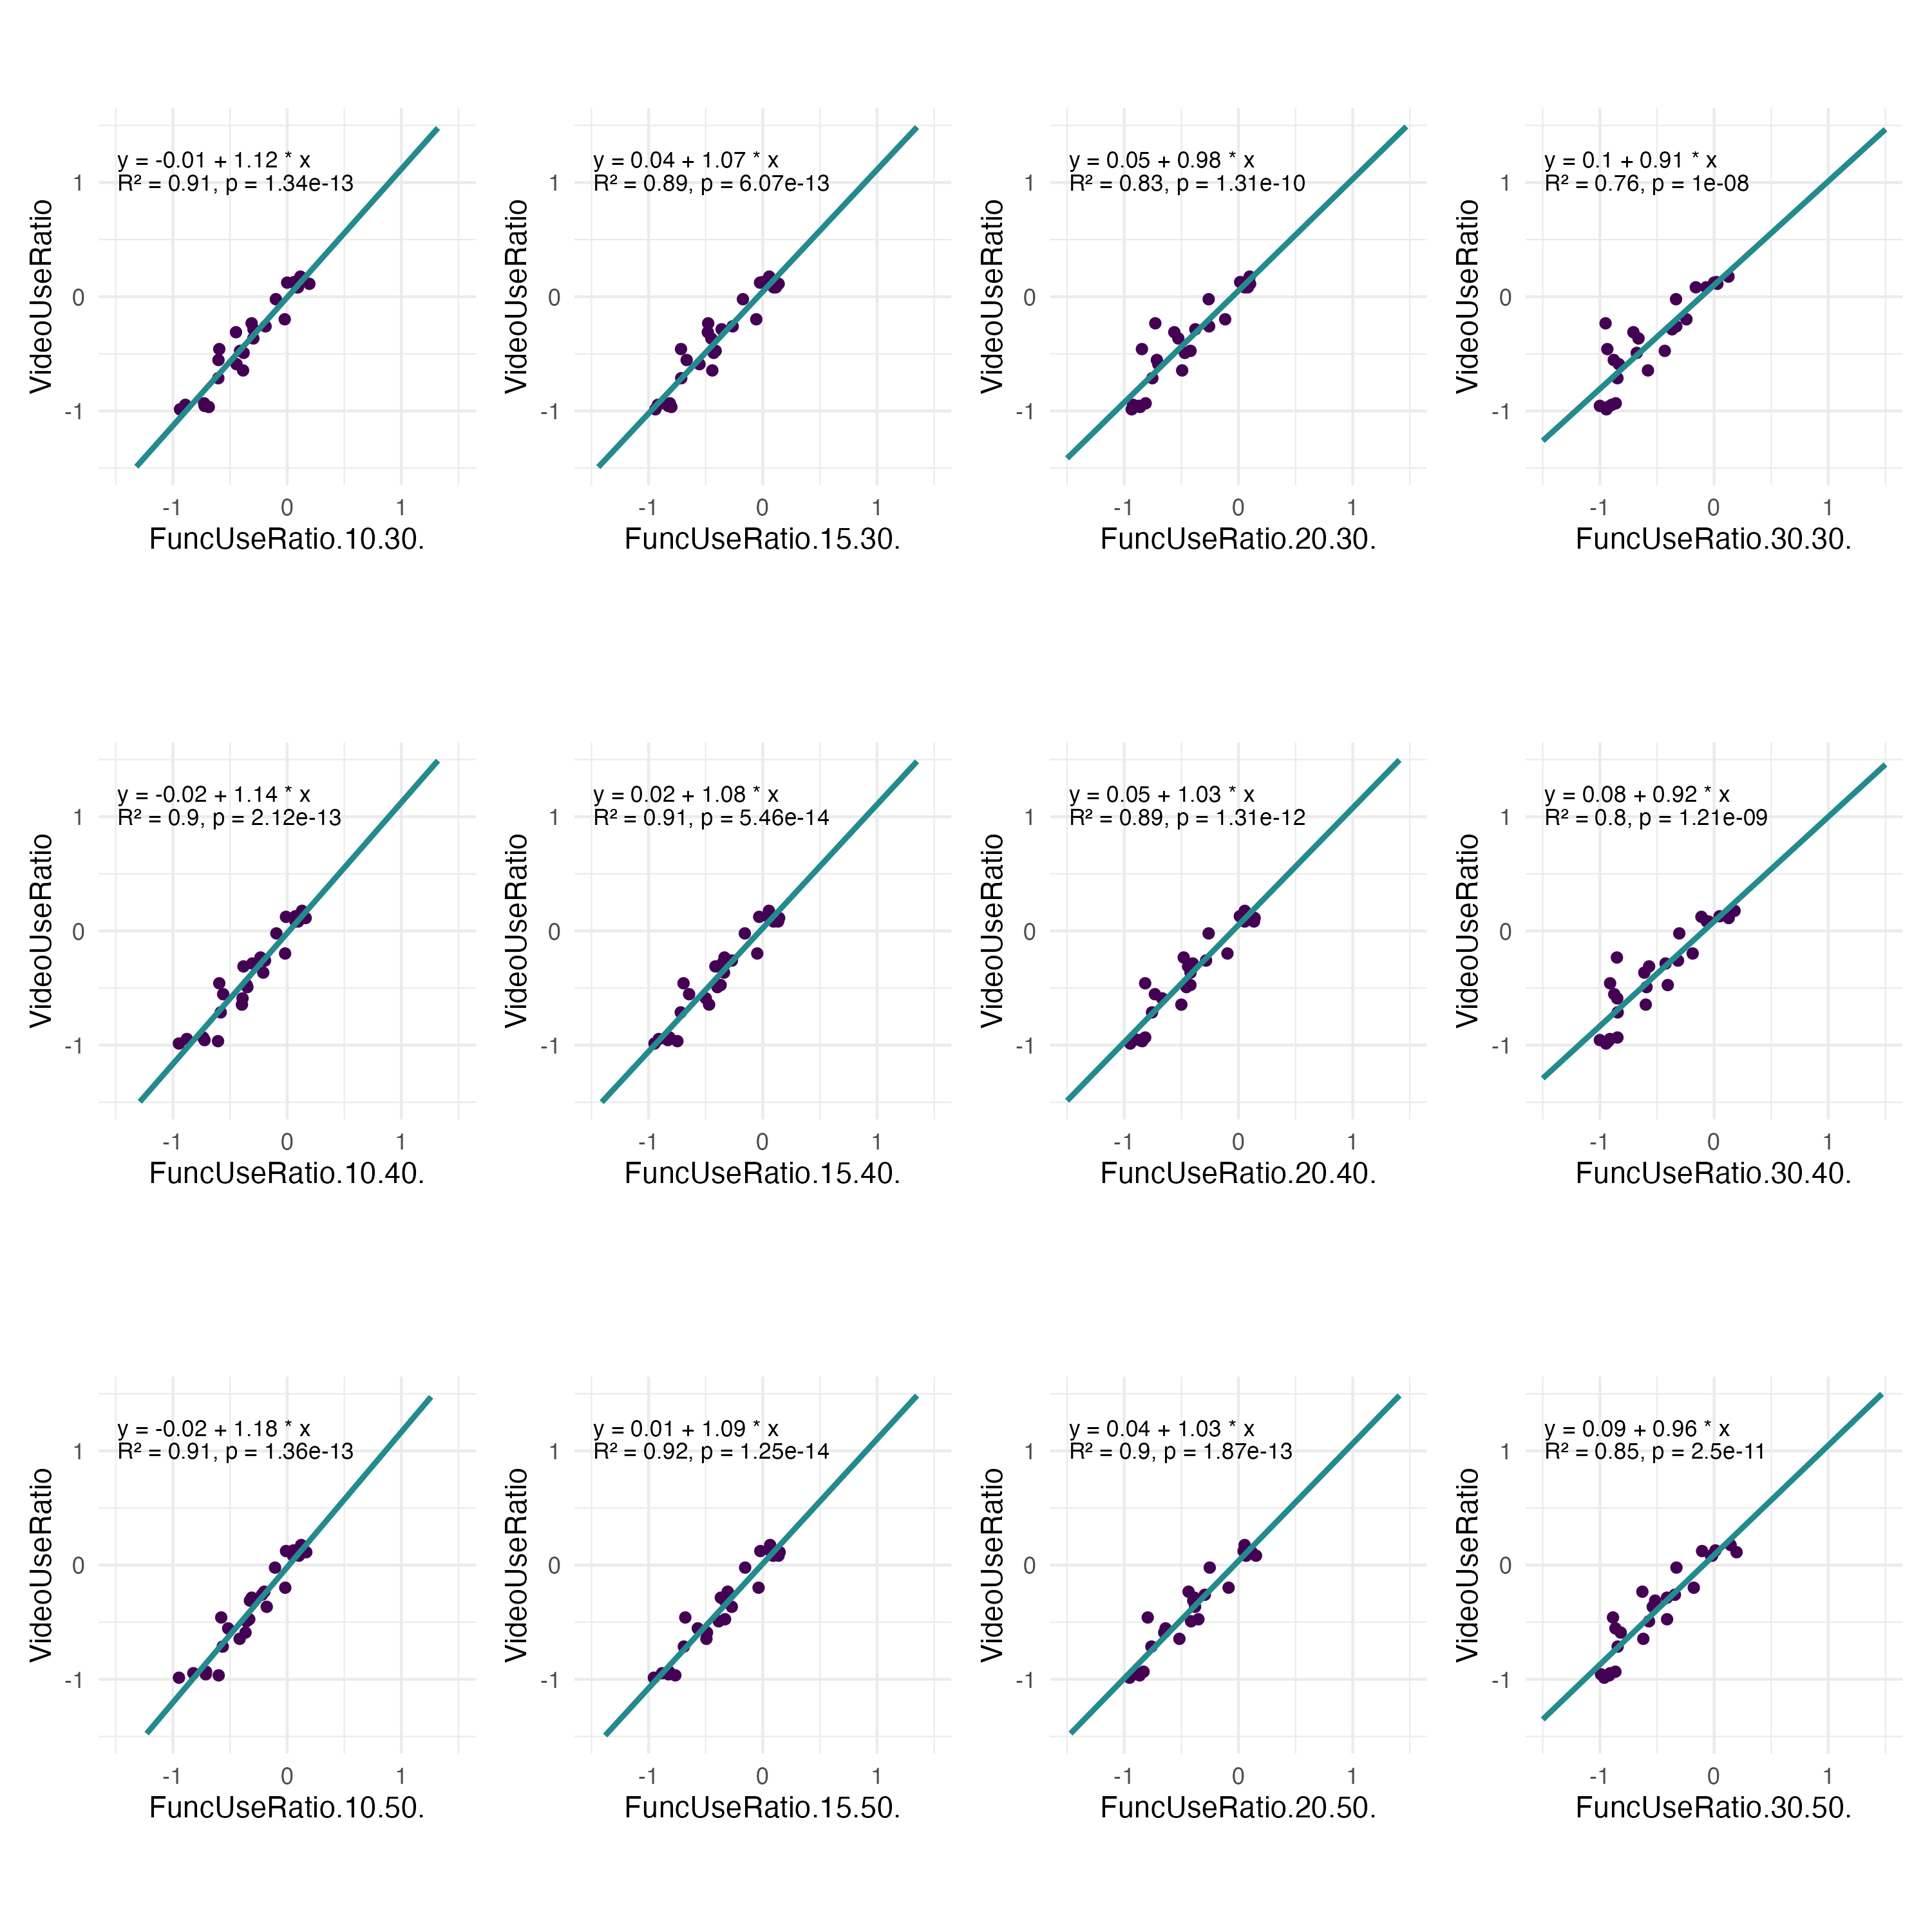


Supplementary material Figure 4.Linear regression models of FuncUseRation for all parameter combinations.

**
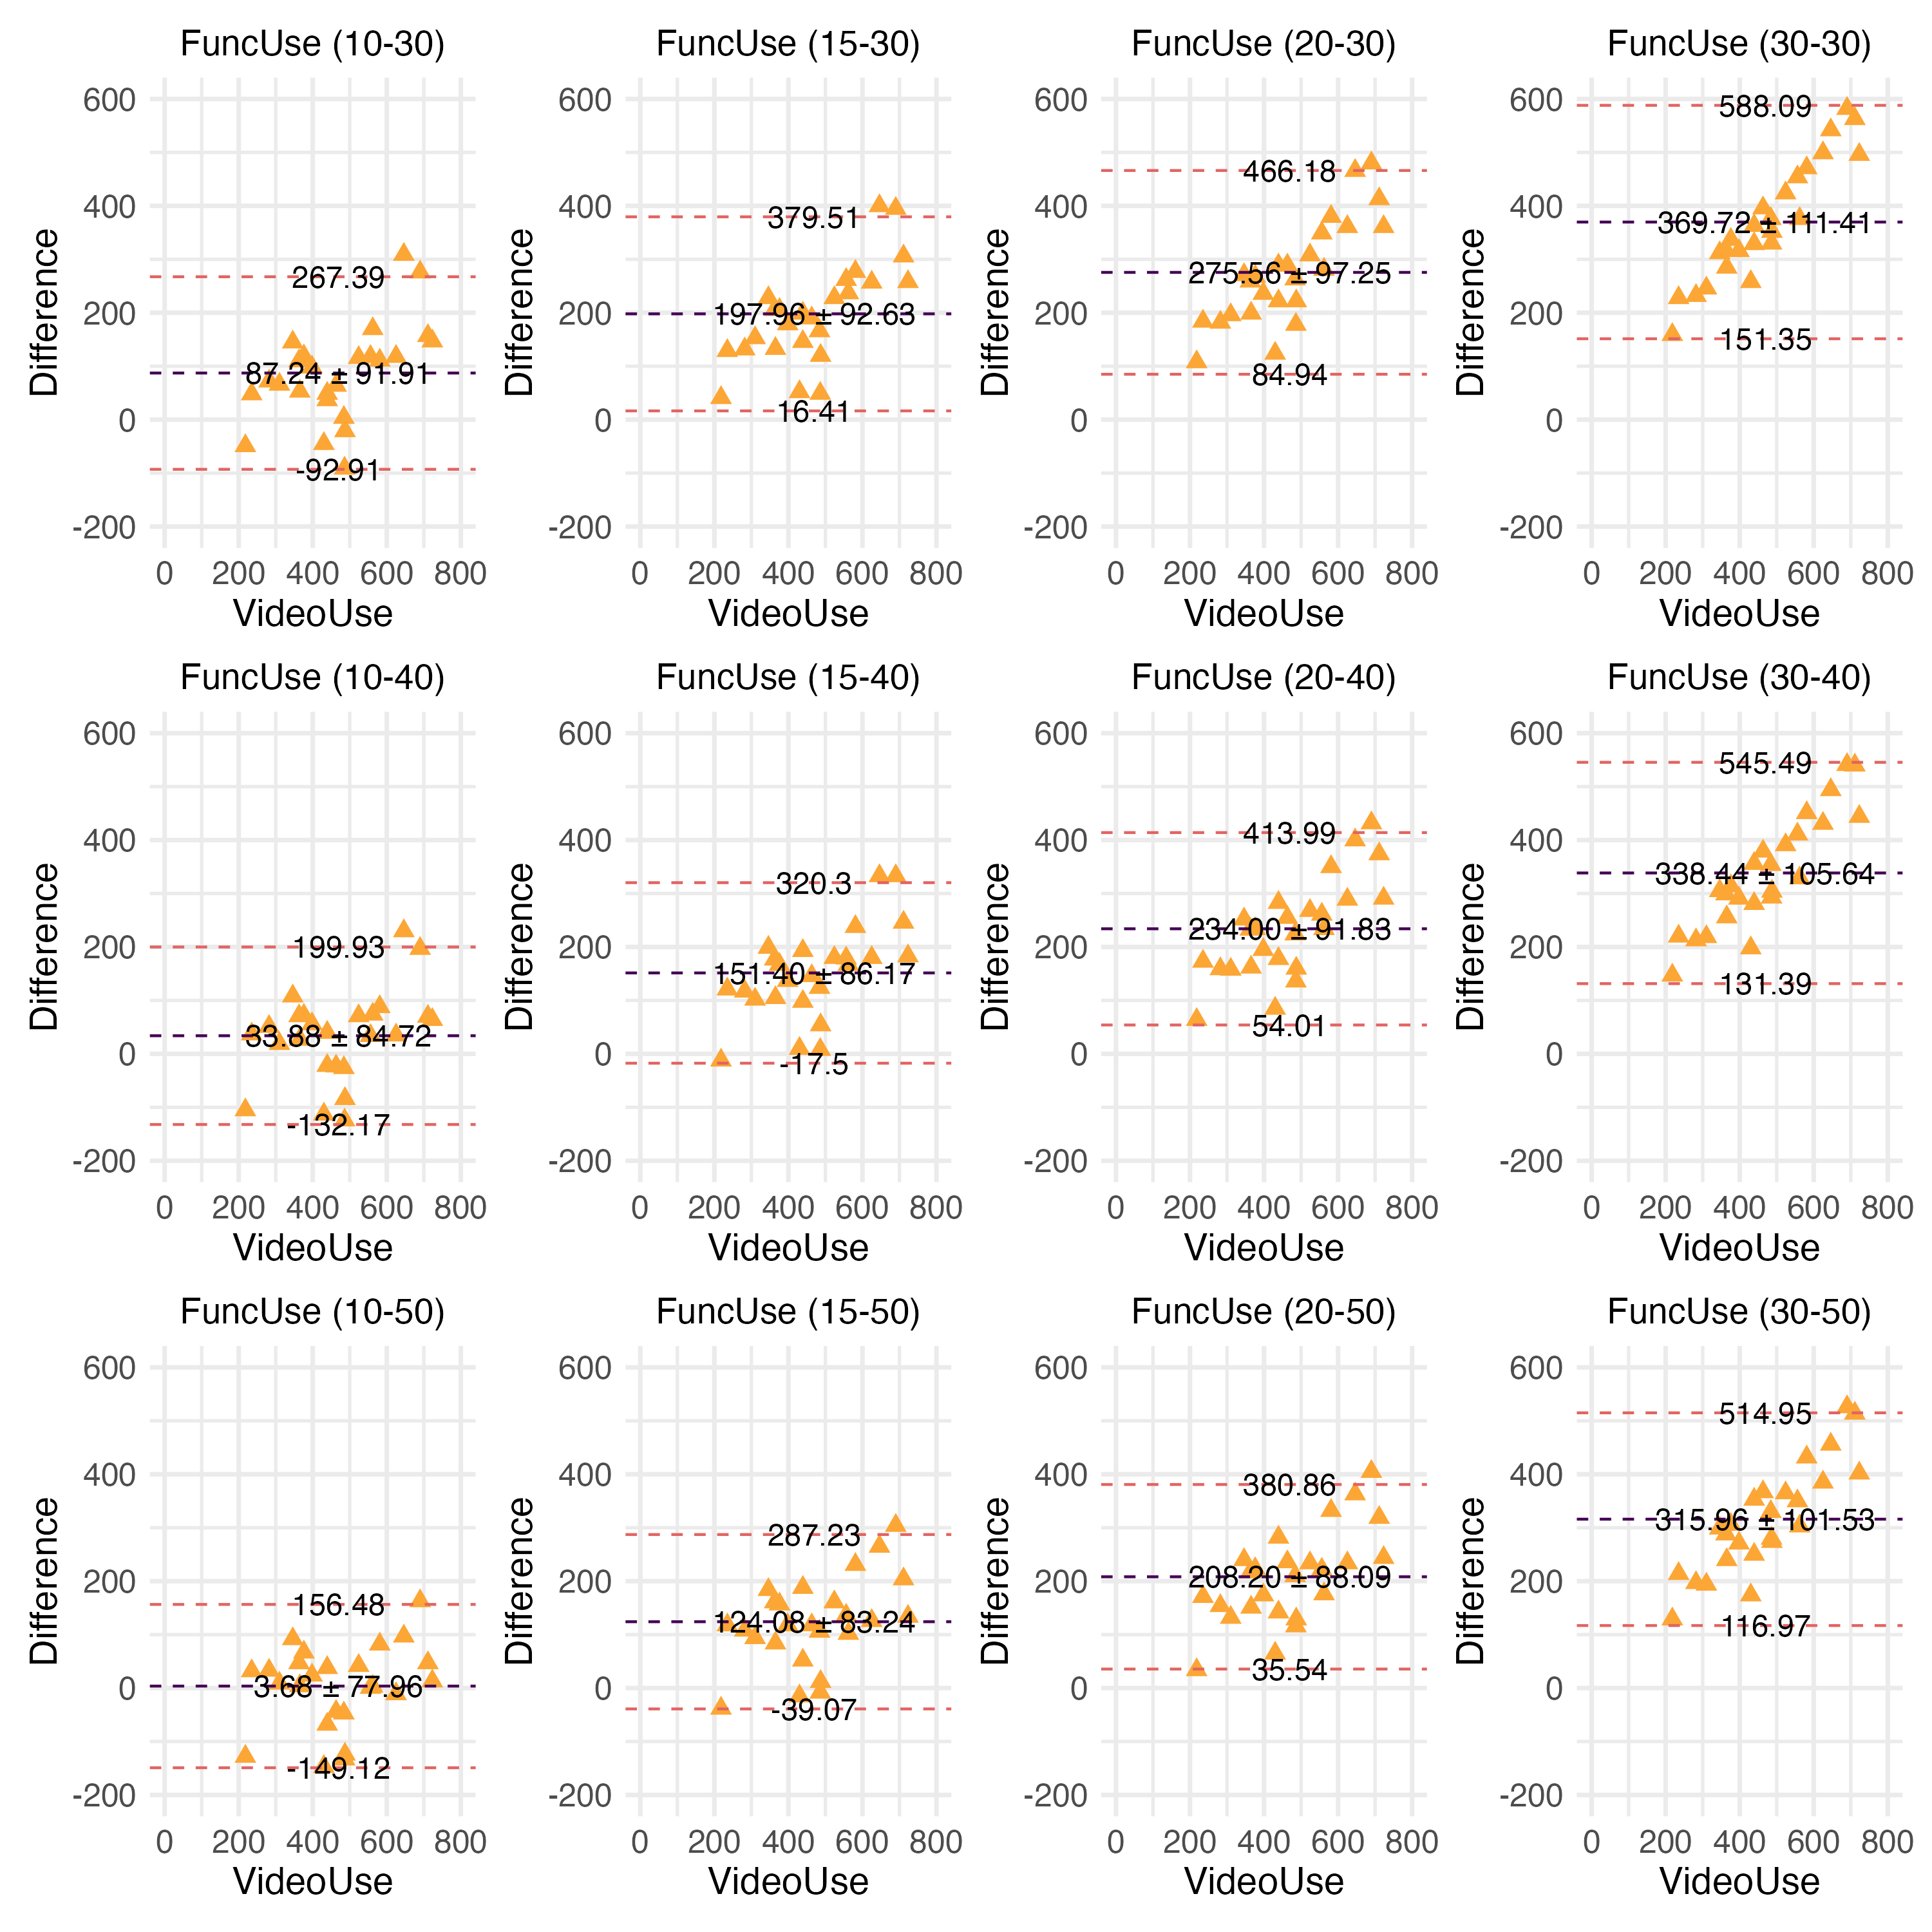
**

Supplementary material Figure 5. Bland–Altman plots of all non-paretic FuncUse parameters.


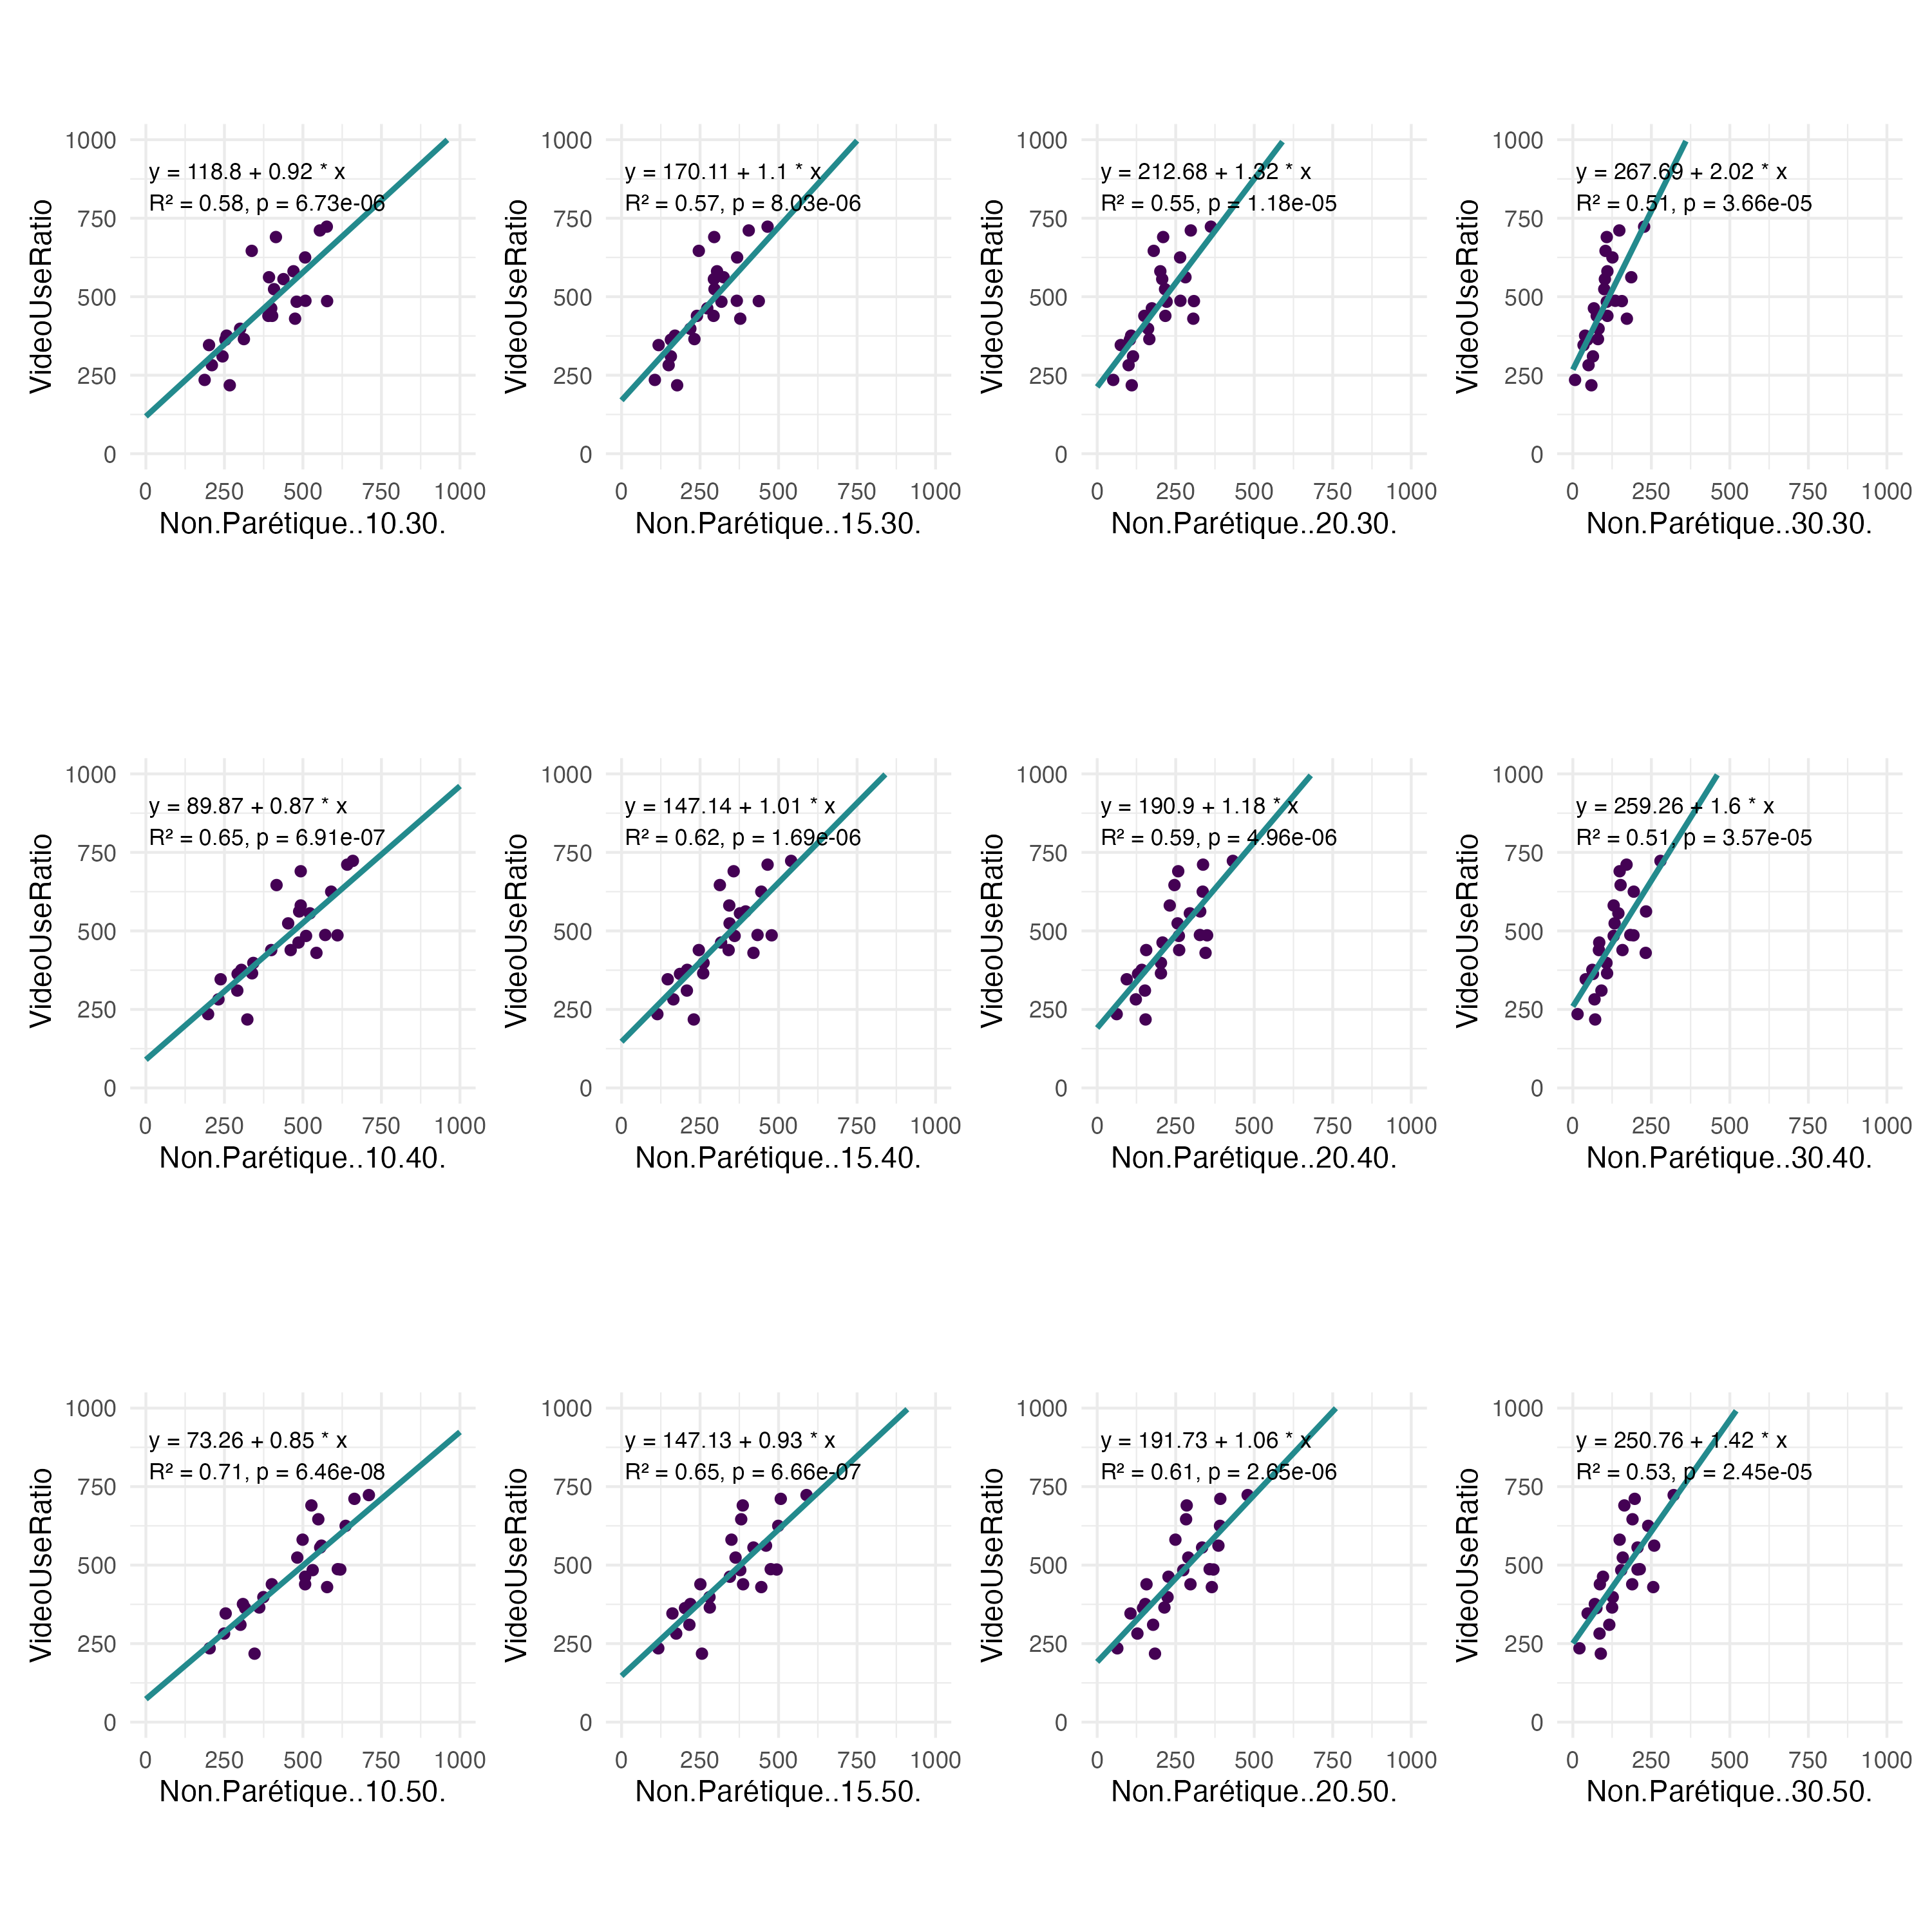


Supplementary material Figure 6. Linear regression models of all non-paretic FuncUse parameters.


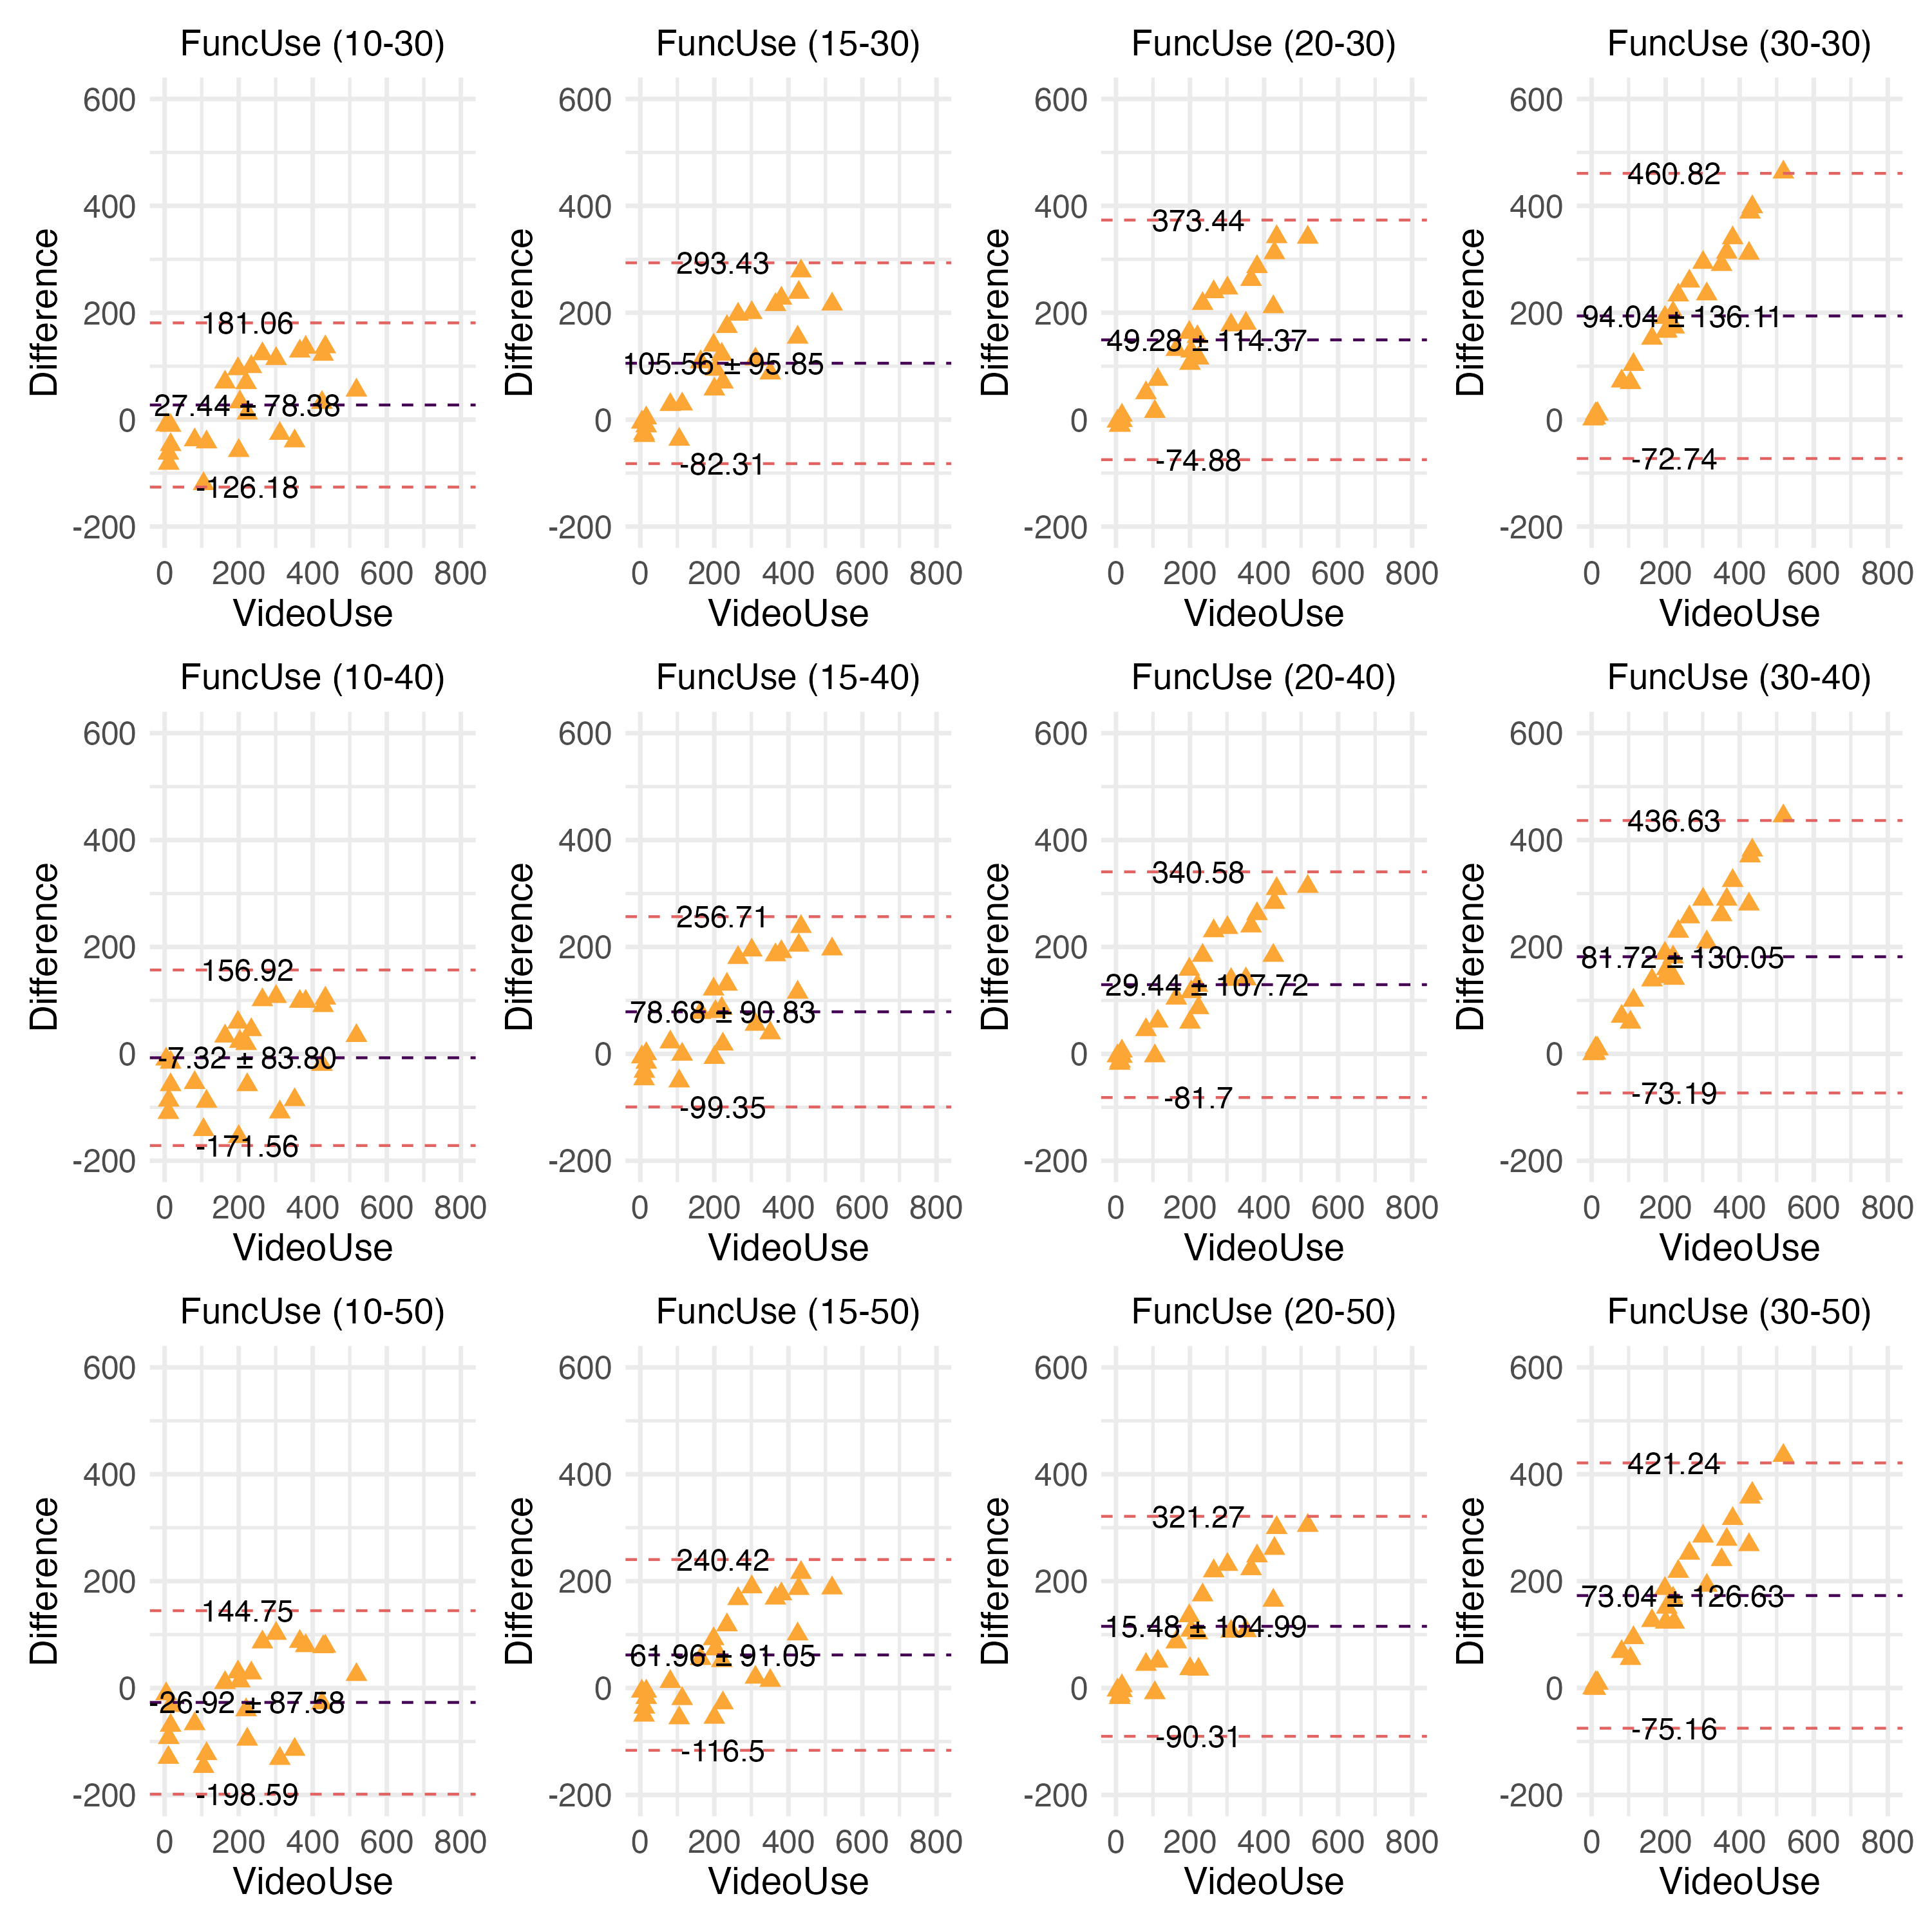


Supplementary material Figure 7. Bland-Altman plot of all paretic FuncUse parameters.


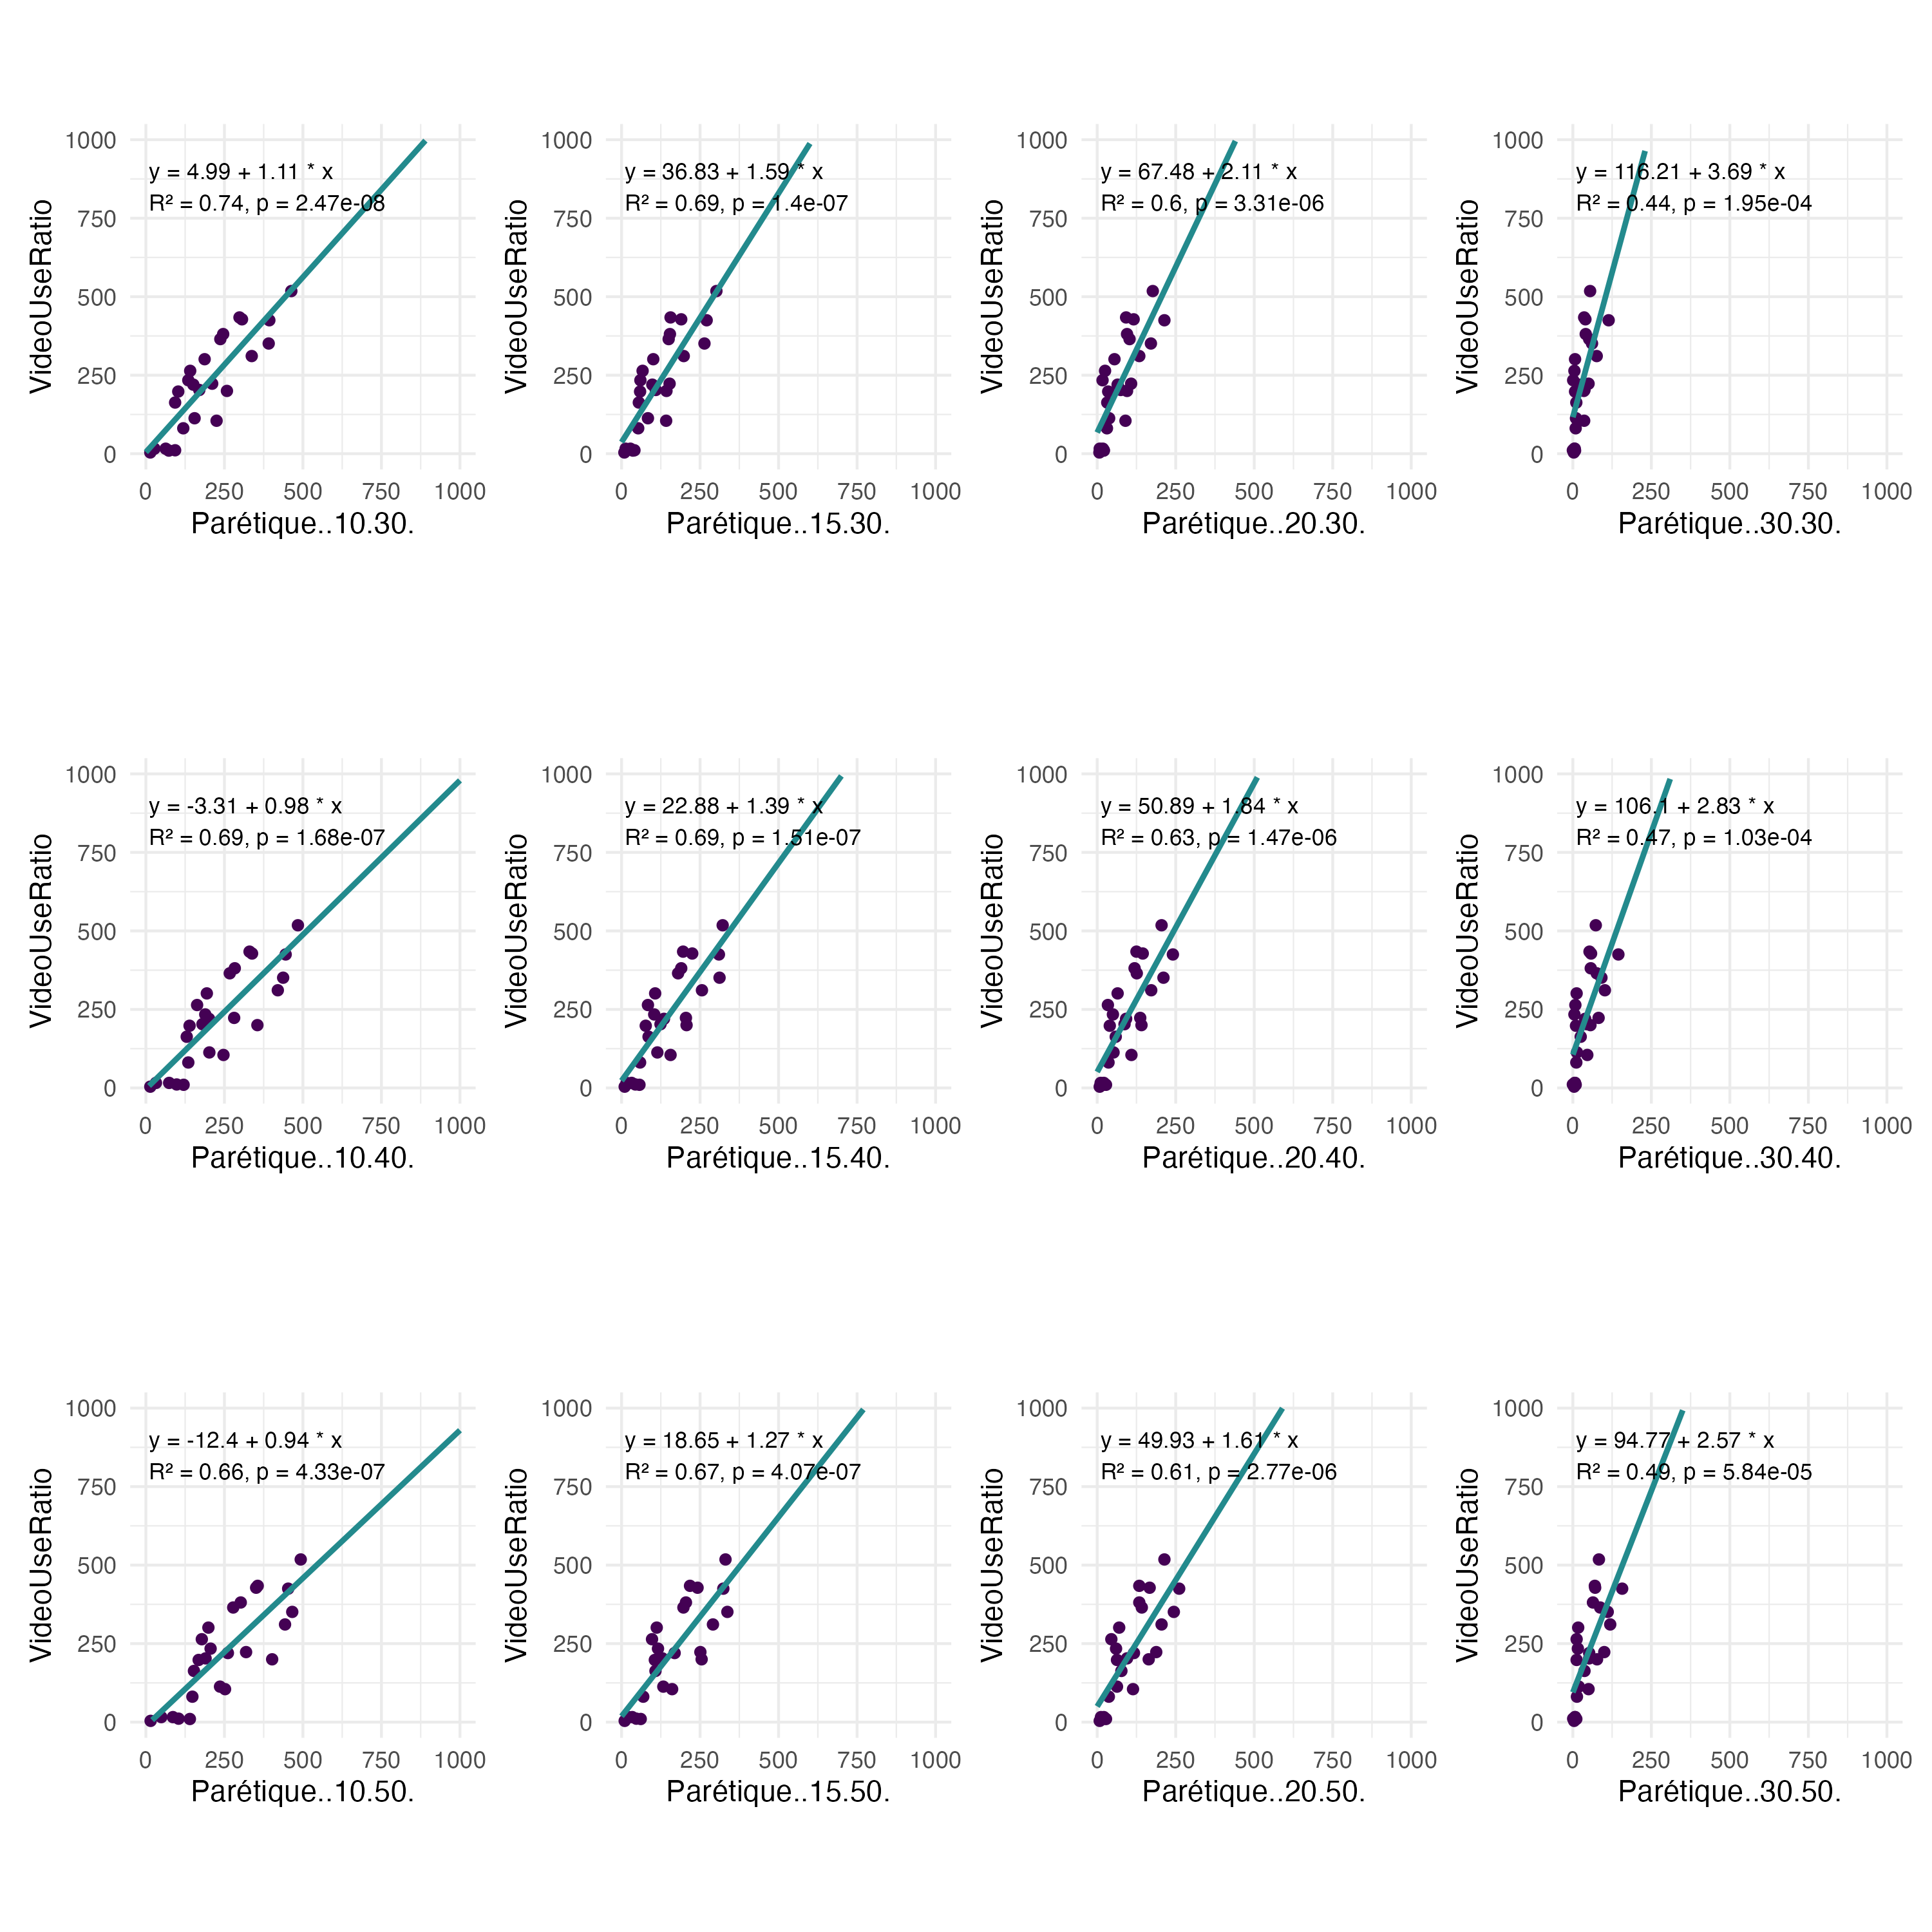


Supplementary material Figure 8. Linear regression model of all paretic FuncUse parameters.
