# Supplementary material for: Validity of FuncUseRatio for Ecological Monitoring of Functional Arm Use After Stroke: Toward Precision Neurorehabilitation
Source: Research Square preprint supplement (doi:10.21203/rs.3.rs-8723804/v1), 2026-02-05
Supplement: Supplementary file 2 [file 5d0929001df68bce96e68c56.docx]

**Supplementary material Table I. List of Functional Movements Performed by the Participants**

| **Activities** | **Position** | **Functional Movement** |
| --- | --- | --- |
| Food | Sit | Pour a drink |
| Food | Sit | Drink a glass |
| Food | Sit | Open a jar |
| Food | Sit | Eat |
| Office | Sit | Type on a keyboard |
| Office | Sit | Use a pair of scissors |
| Office | Sit | Write with a pen |
| Office | Sit | Browse a magazine |
| Dressing | Sit/Stand | Putting on/removing shoes |
| Dressing | Sit/Stand | Putting on/removing shorts |
| Preparing | Stand | Wiping a surface |
| Preparing | Stand | Wash your hands |
| Preparing | Stand | Take a high object and place it on a table |
| Preparing | Stand | Open a drawer and take an object |
| Preparing | Stand | Using a hammer |
| Preparing | Stand | Turning a light on/off |
| Preparing | Stand | Operating a door handle |
| Preparing | Stand | Pick up the phone |
| Beauty care | Stand | Wear deodorant |
| Beauty care | Stand | Brushing your teeth |
| Beauty care | Stand | Style hair |
| Beauty care | Stand | Putting on/removing glasses |
| Non  manual activity | Sit/Stand | Stand up, walk, step over obstacles, turn around, slalom and sit down |
