# Supplementary material for: Validity of FuncUseRatio for Ecological Monitoring of Functional Arm Use After Stroke: Toward Precision Neurorehabilitation
Source: Research Square preprint supplement (doi:10.21203/rs.3.rs-8723804/v1), 2026-02-05
Supplement: Supplementary file 3 [file ea98d403aac60a46ca733d54.docx]

**Table I : Participant Clinical Characteristics**

| Variables |  |  |
| --- | --- | --- |
| Age (years)  median (IQR) | 63 | (52 ; 72) |
| Gender, n (%)  Male | 12 | (48) |
| Female | 13 | (52) |
| Handedness, n (%)  Right-handed | 22 | (88) |
| Left-handed | 3 | (12) |
| Stroke type, n (%)  Hemorrhagic | 11 | (44) |
| Ischemic | 14 | (56) |
| Stroke side, n (%)  Right | 11 | (44) |
| Left | 14 | (56) |
| Box and Block score, median (IQR)  Paretic side | 30 | (8 ; 38) |
| Non-Paretic Side | 49 | (44 ; 57) |
| Ratio ( ) | -0.23 | (-0.76 ; -0.12) |
